# Supplementary material
Source: publisher site journal article supplement (https://www.spandidos-publications.com/6654/downloadSupplementary)
Supplement: Supplementary file 1 [file downloadSupplementary]

## Sheet: Sheet1
Table SV. DEGs generated from the GEO dataset.
id	logFC	AveExpr	t	P.Value	adj.P.Val	B
ANKRD20A5P	-0.574849	2.49793	-25.9159	5.14e-70	1.06e-65	148.632
LINC01697	-0.555503	2.33656	-24.1718	6.17e-65	6.34e-61	137.098
CYP4F29P	-0.340535	2.65096	-23.1635	6.33e-62	4.33e-58	130.253
ANKRD20A11P	-0.45041	3.15087	-22.8838	4.43e-61	2.27e-57	128.331
COL4A1	0.472461	3.31377	22.5756	3.82e-60	1.57e-56	126.202
PADI1	-0.462277	2.94225	-21.6092	3.53e-57	1.21e-53	119.453
MMP1	1.32185	3.24484	21.1966	6.73e-56	1.98e-52	116.537
FMO9P	-0.700467	2.29767	-20.8835	6.38e-55	1.64e-51	114.312
SLC8A1-AS1	-0.598492	2.24567	-20.8377	8.88e-55	2.03e-51	113.985
ATP6V0A4	-0.642622	2.51225	-20.4408	1.57e-53	3.22e-50	111.147
COL4A2	0.408723	3.27108	20.1344	1.45e-52	2.61e-49	108.943
COL1A1	0.389154	3.32881	20.1275	1.53e-52	2.61e-49	108.894
GREM1	0.83141	3.07664	19.8919	8.51e-52	1.34e-48	107.193
LINC02487	-0.711709	2.69272	-19.8289	1.35e-51	1.98e-48	106.736
EHD3	-0.230016	2.80214	-19.0114	5.5e-49	7.53e-46	100.786
LOC100506098	-0.614301	2.84327	-18.9683	7.56e-49	9.71e-46	100.471
KRT14	0.318127	3.77657	18.8777	1.48e-48	1.79e-45	99.8071
RFK	-0.238938	3.18766	-18.7571	3.61e-48	4.12e-45	98.9225
SCIN	-0.523142	2.59137	-18.6689	6.95e-48	7.51e-45	98.2744
COL6A3	0.349698	3.56412	18.5382	1.83e-47	1.88e-44	97.3131
ETNK2	-0.409212	2.73396	-18.4816	2.79e-47	2.73e-44	96.8966
CAB39L	-0.344716	2.77706	-18.2277	1.85e-46	1.73e-43	95.0241
NUCB2	-0.296202	3.06621	-18.1805	2.63e-46	2.35e-43	94.6751
SERPINH1	0.36355	3.29282	18.1577	3.12e-46	2.67e-43	94.5067
CTHRC1	0.577751	3.36023	18.1415	3.52e-46	2.89e-43	94.3869
CAPN5	-0.277242	2.67083	-17.8897	2.31e-45	1.83e-42	92.5229
RBM20	-0.55714	2.25527	-17.6089	1.89e-44	1.44e-41	90.4395
CPPED1	-0.219308	2.88346	-17.4243	7.57e-44	5.37e-41	89.0658
VIT	-0.370286	2.73432	-17.4082	8.54e-44	5.85e-41	88.9466
CDH3	0.381857	3.44462	17.3755	1.09e-43	7.13e-41	88.7031
TCP11L2	-0.203265	2.39823	-17.3421	1.4e-43	8.74e-41	88.4539
MAB21L4	-0.468229	2.68331	-17.0139	1.66e-42	9.75e-40	86.006
C15orf62	-0.339065	2.53322	-16.884	4.42e-42	2.53e-39	85.0352
COL5A2	0.462909	3.36778	16.8081	7.84e-42	4.36e-39	84.4679
SHROOM3	-0.288287	2.77873	-16.6967	1.82e-41	9.84e-39	83.634
FUT6	-0.375573	2.80842	-16.6818	2.04e-41	1.07e-38	83.5224
STN1	-0.211305	2.78207	-16.6519	2.55e-41	1.31e-38	83.2989
LINC00551	-0.292033	2.03777	-16.6028	3.7e-41	1.85e-38	82.9312
FLG-AS1	-0.249901	2.20998	-16.5846	4.24e-41	2.08e-38	82.7949
EMP1	-0.31515	3.16942	-16.5114	7.38e-41	3.53e-38	82.246
PLAU	0.509432	3.16246	16.447	1.2e-40	5.61e-38	81.7635
OR7E14P	-0.475631	2.39338	-16.4041	1.66e-40	7.59e-38	81.442
MYZAP	-0.460725	2.8846	-16.3945	1.79e-40	7.98e-38	81.3703
MINPP1	0.320012	2.78671	16.1805	9.03e-40	3.95e-37	79.7642
TRIP10	-0.220265	3.15608	-16.0715	2.06e-39	8.65e-37	78.946
SORBS2	-0.346096	2.53325	-16.034	2.74e-39	1.13e-36	78.6643
LUM	0.323694	3.34927	16.0098	3.29e-39	1.33e-36	78.4819
SLC6A4	-0.314816	2.23335	-15.9911	3.79e-39	1.5e-36	78.3417
FAP	0.575643	3.04214	15.9871	3.91e-39	1.51e-36	78.3115
SH3BGRL2	-0.528441	2.94059	-15.8795	8.84e-39	3.25e-36	77.5031
PPCDC	-0.21793	2.75244	-15.8053	1.55e-38	5.6e-36	76.9448
MMP12	0.867822	3.279	15.7446	2.46e-38	8.72e-36	76.489
LPIN1	-0.306795	2.90746	-15.7174	3.03e-38	1.05e-35	76.2842
BTC	-0.302226	2.14463	-15.7045	3.34e-38	1.14e-35	76.187
LOC100130449	-0.349701	2.31396	-15.6594	4.7e-38	1.56e-35	75.8478
PAQR8	-0.280699	2.86781	-15.6337	5.71e-38	1.86e-35	75.6546
GPD1L	-0.367976	3.09517	-15.5409	1.16e-37	3.71e-35	74.9562
ADAMTS2	0.346575	2.86386	15.4857	1.76e-37	5.55e-35	74.5412
MYO1B	0.349317	3.07587	15.4555	2.21e-37	6.88e-35	74.3138
HCG22	-0.377881	2.74107	-15.326	5.9e-37	1.76e-34	73.3391
COL16A1	0.254592	3.16948	15.3074	6.8e-37	2e-34	73.1989
RERGL	-0.329244	2.18814	-15.2301	1.22e-36	3.54e-34	72.6169
AFDN-DT	-0.277254	2.32567	-15.1935	1.62e-36	4.61e-34	72.3412
SYTL4	-0.208895	2.55197	-15.1834	1.74e-36	4.91e-34	72.2653
PKIB	-0.347308	2.50561	-15.1778	1.82e-36	5.03e-34	72.2236
SORT1	-0.250043	2.95994	-15.1767	1.84e-36	5.03e-34	72.2151
TJP3	-0.285639	2.72408	-15.1621	2.05e-36	5.54e-34	72.1052
SAMD5	-0.383069	2.48063	-15.0711	4.09e-36	1.07e-33	71.4197
SNX31	-0.674071	2.47184	-15.0576	4.53e-36	1.16e-33	71.3185
AIF1L	-0.320666	2.92148	-15.0344	5.41e-36	1.37e-33	71.1438
GCHFR	-0.35876	2.95788	-14.966	9.1e-36	2.25e-33	70.6284
IFI6	0.538721	3.17855	14.9583	9.64e-36	2.36e-33	70.5708
VSIG10	-0.219785	2.67811	-14.9172	1.32e-35	3.15e-33	70.2614
LOC100507221	-0.379132	2.08722	-14.8945	1.57e-35	3.66e-33	70.0903
MFAP2	0.416663	3.17993	14.8116	2.94e-35	6.57e-33	69.4661
ESPL1	-0.233509	3.08464	-14.8082	3.02e-35	6.66e-33	69.4405
SLC16A1	0.434304	2.95606	14.7749	3.88e-35	8.49e-33	69.19
COL5A1	0.360525	3.12446	14.7556	4.5e-35	9.63e-33	69.0443
FSCN1	0.310148	3.18463	14.7506	4.67e-35	9.9e-33	69.007
F2RL2	0.371076	2.6274	14.72	5.89e-35	1.21e-32	68.7765
SYT8	-0.342546	2.67794	-14.72	5.9e-35	1.21e-32	68.776
LEXM	-0.351535	2.51199	-14.7087	6.42e-35	1.29e-32	68.6916
TTC9	-0.405515	2.80371	-14.672	8.49e-35	1.69e-32	68.4148
CCN4	0.446196	2.68156	14.6525	9.84e-35	1.93e-32	68.2681
GREM2	-0.359618	2.32344	-14.6454	1.04e-34	2.01e-32	68.2148
FNDC3B	0.239411	2.99039	14.6426	1.06e-34	2.04e-32	68.1939
BARX2	-0.223795	2.80406	-14.6223	1.24e-34	2.33e-32	68.0412
WDR66	0.39555	2.73399	14.6021	1.44e-34	2.7e-32	67.8889
HOXC6	0.588721	2.76169	14.5741	1.79e-34	3.31e-32	67.6778
PSCA	-0.537094	2.85252	-14.5611	1.97e-34	3.58e-32	67.5806
COL1A2	0.31241	3.59352	14.4851	3.51e-34	6.22e-32	67.0082
TYMP	0.271373	3.00198	14.4802	3.64e-34	6.4e-32	66.9716
LOX	0.442299	2.79394	14.4787	3.68e-34	6.41e-32	66.9603
HLCS	-0.296857	2.70275	-14.4355	5.11e-34	8.69e-32	66.6349
COL7A1	0.265879	3.13309	14.4292	5.37e-34	9.04e-32	66.5874
SERPINE1	0.634959	2.99506	14.4003	6.68e-34	1.11e-31	66.3704
MFHAS1	0.223837	3.1574	14.297	1.46e-33	2.35e-31	65.5935
SLC13A4	-0.224046	2.79995	-14.2882	1.56e-33	2.49e-31	65.5269
ELOVL6	-0.319989	2.63363	-14.2592	1.95e-33	3.08e-31	65.3093
ZNF519	-0.223026	2.40721	-14.2532	2.04e-33	3.2e-31	65.2637
CLDN11	-0.212565	2.46448	-14.2503	2.08e-33	3.25e-31	65.2422
CLIC4	0.224267	3.19576	14.2226	2.57e-33	3.94e-31	65.0341
ZNF823	-0.289595	2.82465	-14.2117	2.79e-33	4.25e-31	64.9521
GALNT12	-0.502571	2.82654	-14.1947	3.18e-33	4.8e-31	64.8238
COL3A1	0.299527	3.38379	14.1618	4.08e-33	6.07e-31	64.5767
IKZF2	-0.257941	2.62941	-14.1565	4.25e-33	6.28e-31	64.5369
PDE6A	-0.222138	2.43228	-14.1287	5.24e-33	7.64e-31	64.3282
C12orf75	0.359071	3.15546	14.0833	7.4e-33	1.06e-30	63.9864
SFTA2	-0.452764	2.29719	-14.0648	8.51e-33	1.21e-30	63.8479
PLAUR	0.303834	3.02612	14.0621	8.69e-33	1.22e-30	63.8272
PXDN	0.382057	3.06526	14.0256	1.15e-32	1.58e-30	63.5535
MYOC	-0.29536	2.6811	-14.0212	1.19e-32	1.62e-30	63.5198
ETFDH	-0.248489	2.8913	-13.9816	1.6e-32	2.18e-30	63.2229
INHBA	0.589481	2.8992	13.9759	1.67e-32	2.26e-30	63.1802
PLA2G7	0.508226	2.87835	13.9712	1.73e-32	2.33e-30	63.1442
GGT6	-0.37739	2.86104	-13.9589	1.9e-32	2.54e-30	63.0519
FUT3	-0.412975	2.85579	-13.9559	1.94e-32	2.58e-30	63.0296
ACPP	-0.34124	2.68877	-13.9198	2.55e-32	3.34e-30	62.7588
FAM3D	-0.49662	3.05877	-13.9142	2.66e-32	3.47e-30	62.7169
TNFAIP6	0.552354	2.97659	13.9051	2.86e-32	3.67e-30	62.6483
PPP1R3C	-0.389303	2.72375	-13.8989	2.99e-32	3.77e-30	62.6019
ENAH	0.247613	2.89407	13.8493	4.36e-32	5.46e-30	62.2291
PMEPA1	0.298497	2.94635	13.8041	6.14e-32	7.64e-30	61.8902
TPBG	0.204565	2.99128	13.7957	6.54e-32	8.09e-30	61.8271
POSTN	0.524074	2.90272	13.7325	1.05e-31	1.29e-29	61.3532
NDRG2	-0.262474	2.92229	-13.7223	1.14e-31	1.38e-29	61.2766
ISG15	0.424712	3.45695	13.7125	1.23e-31	1.47e-29	61.2033
CDKN2AIP	-0.221773	2.98386	-13.6824	1.54e-31	1.84e-29	60.9775
TMEM100	-0.427696	2.47943	-13.6054	2.76e-31	3.22e-29	60.4003
SNAI2	0.243937	3.42686	13.5904	3.09e-31	3.59e-29	60.2878
THY1	0.28806	3.13762	13.5876	3.16e-31	3.64e-29	60.267
LNX1	-0.299046	2.86799	-13.5848	3.22e-31	3.68e-29	60.2457
LAMC2	0.563001	3.04525	13.5433	4.41e-31	4.98e-29	59.9347
KRT78	-0.644102	3.10063	-13.5333	4.76e-31	5.29e-29	59.8597
PANX1	0.260115	2.88671	13.5302	4.87e-31	5.38e-29	59.8367
CGNL1	-0.48633	2.9179	-13.5291	4.91e-31	5.4e-29	59.8288
PDPN	0.343626	2.84157	13.4821	7.01e-31	7.58e-29	59.4766
HOMER3	0.263616	2.88339	13.4658	7.92e-31	8.48e-29	59.3548
TP53INP2	-0.286043	3.21985	-13.4152	1.16e-30	1.22e-28	58.9758
C1QTNF7	-0.264385	2.2853	-13.3664	1.68e-30	1.73e-28	58.6109
REEP6	-0.25389	2.71774	-13.3618	1.74e-30	1.78e-28	58.5763
CRYM	-0.294255	2.92181	-13.3585	1.78e-30	1.81e-28	58.5519
C5orf66-AS1	-0.510219	2.76021	-13.3037	2.7e-30	2.7e-28	58.1417
CYP3A5	-0.43516	2.63489	-13.3012	2.75e-30	2.74e-28	58.1234
KRT16	0.428794	3.6501	13.2932	2.92e-30	2.9e-28	58.0634
LEPR	-0.27234	2.58349	-13.2458	4.17e-30	4.1e-28	57.7092
ADH1B	-0.4228	2.32266	-13.2411	4.32e-30	4.23e-28	57.6746
C4orf48	0.238128	3.03306	13.1786	6.92e-30	6.61e-28	57.2072
ECM1	-0.315042	3.42026	-13.1713	7.31e-30	6.89e-28	57.153
MMP3	0.899748	3.06979	13.1545	8.29e-30	7.78e-28	57.0277
BNC1	0.437995	2.92214	13.1117	1.15e-29	1.06e-27	56.7078
MMP10	0.939823	2.91183	13.0995	1.26e-29	1.15e-27	56.6168
LPCAT1	0.252785	3.10611	13.0949	1.3e-29	1.19e-27	56.5825
CRISP3	-1.1188	2.66829	-13.0943	1.31e-29	1.19e-27	56.5781
LOC101928429	-0.375838	2.33128	-13.0539	1.77e-29	1.56e-27	56.2769
NID2	0.404623	3.00539	13.0535	1.77e-29	1.56e-27	56.2742
LRRC15	0.319231	2.70341	13.0517	1.8e-29	1.57e-27	56.2605
COBL	-0.335868	2.57253	-13.0517	1.8e-29	1.57e-27	56.2604
SMAGP	-0.263673	3.20218	-13.0231	2.23e-29	1.94e-27	56.0478
USP6NL	-0.219638	2.53357	-12.9997	2.66e-29	2.3e-27	55.8729
MGLL	-0.273792	3.26089	-12.9824	3.03e-29	2.58e-27	55.7444
SLC25A23	-0.221546	2.77327	-12.9683	3.37e-29	2.84e-27	55.6391
MB21D2	0.203965	2.98228	12.9586	3.62e-29	3.04e-27	55.5668
MICAL2	0.246121	2.78889	12.954	3.75e-29	3.13e-27	55.5323
TSPAN6	-0.234637	3.26975	-12.9356	4.31e-29	3.58e-27	55.3953
MAMDC2	-0.629139	2.8093	-12.9315	4.44e-29	3.68e-27	55.3647
COL8A1	0.344606	2.47267	12.9143	5.06e-29	4.17e-27	55.2365
SMIM5	-0.267852	3.03498	-12.9052	5.41e-29	4.43e-27	55.169
EPHX2	-0.339209	2.86629	-12.8986	5.69e-29	4.64e-27	55.1201
IL36A	-0.480986	2.79651	-12.8951	5.84e-29	4.73e-27	55.0937
FAM221A	-0.215934	2.60206	-12.8636	7.4e-29	5.91e-27	54.8598
MUC20	-0.383548	2.71806	-12.8574	7.75e-29	6.17e-27	54.8136
FCGR2A	0.219021	2.64174	12.8472	8.37e-29	6.64e-27	54.7377
PLEKHG6	-0.209281	2.93785	-12.8386	8.93e-29	7.05e-27	54.6735
PAX9	-0.46794	2.8303	-12.7695	1.5e-28	1.17e-26	54.1599
PAIP2B	-0.268302	2.78476	-12.7681	1.52e-28	1.17e-26	54.1494
KAT2B	-0.262991	2.74906	-12.7483	1.76e-28	1.34e-26	54.002
SMAD7	0.221402	2.86062	12.7371	1.91e-28	1.44e-26	53.9188
SPNS2	-0.356749	2.96572	-12.7289	2.03e-28	1.52e-26	53.8578
SCGB1A1	-0.51562	2.50267	-12.7223	2.14e-28	1.59e-26	53.8093
FAM214A	-0.224555	2.97266	-12.722	2.14e-28	1.59e-26	53.8069
CHST11	0.310492	2.9182	12.7205	2.17e-28	1.61e-26	53.7955
TMPRSS2	-0.259436	2.70583	-12.7107	2.33e-28	1.72e-26	53.7229
SASH1	-0.240786	3.2963	-12.7075	2.39e-28	1.75e-26	53.6989
PRXL2C	0.211692	3.02792	12.6913	2.7e-28	1.96e-26	53.5787
ENDOU	-0.633269	2.92653	-12.6739	3.07e-28	2.23e-26	53.4495
CEACAM1	-0.364593	2.97484	-12.6732	3.09e-28	2.23e-26	53.4448
SLC27A6	-0.394312	2.34112	-12.6556	3.52e-28	2.51e-26	53.314
STAT1	0.283121	3.26403	12.6501	3.67e-28	2.58e-26	53.2733
COL4A5	0.276049	2.7294	12.6395	3.97e-28	2.79e-26	53.1944
IFI27	0.280098	3.62644	12.62	4.6e-28	3.19e-26	53.0498
TNFAIP3	0.256482	3.33421	12.5885	5.82e-28	4.01e-26	52.8161
DRAM1	0.236877	3.00104	12.5626	7.07e-28	4.84e-26	52.624
FAM89A	0.357318	3.03414	12.5605	7.17e-28	4.9e-26	52.609
LINC01315	-0.237692	2.76599	-12.549	7.82e-28	5.32e-26	52.5231
LYVE1	-0.394102	2.69206	-12.5265	9.25e-28	6.25e-26	52.3569
UPK3B	-0.234808	2.84212	-12.5125	1.03e-27	6.9e-26	52.2527
ADAM12	0.351108	2.70815	12.5076	1.07e-27	7.09e-26	52.2168
DHRS11	-0.262285	2.69695	-12.5035	1.1e-27	7.26e-26	52.1866
CYP11A1	-0.240677	2.47663	-12.4793	1.32e-27	8.65e-26	52.007
MMP9	0.446181	3.23583	12.4786	1.32e-27	8.66e-26	52.0022
CTSC	0.211	3.25465	12.4636	1.48e-27	9.63e-26	51.8913
ANXA9	-0.542263	2.72548	-12.4573	1.55e-27	1.01e-25	51.844
EPS8L1	-0.29038	3.04562	-12.4493	1.65e-27	1.06e-25	51.7851
SLITRK5	-0.210488	2.3302	-12.3756	2.86e-27	1.82e-25	51.2402
SLC26A2	-0.267025	3.18638	-12.3376	3.79e-27	2.39e-25	50.9597
FMNL2	0.204686	2.75318	12.3348	3.87e-27	2.43e-25	50.9387
IKBIP	0.239271	2.67489	12.3343	3.89e-27	2.44e-25	50.9349
CAPN14	-0.827108	2.62228	-12.3227	4.24e-27	2.63e-25	50.8491
FAM149A	-0.200405	2.31921	-12.2997	5.03e-27	3.05e-25	50.6797
TMEM45A	0.402253	3.38312	12.2955	5.19e-27	3.14e-25	50.6482
FAT1	0.234473	3.32072	12.2932	5.28e-27	3.18e-25	50.6314
ANKRD35	-0.349488	2.91094	-12.2804	5.81e-27	3.49e-25	50.5367
PARP12	0.212279	3.20503	12.2749	6.05e-27	3.61e-25	50.4967
SOCS3	0.208549	2.7901	12.2726	6.15e-27	3.65e-25	50.4799
BCAS1	-0.213349	2.65603	-12.2591	6.81e-27	4.03e-25	50.3802
CA13	-0.228635	2.76555	-12.2558	6.98e-27	4.12e-25	50.3557
FAM189A2	-0.277172	2.73741	-12.2245	8.81e-27	5.16e-25	50.1249
MSANTD3	0.235697	2.76822	12.2141	9.52e-27	5.56e-25	50.0479
NETO2	0.342537	2.94282	12.1896	1.14e-26	6.57e-25	49.8676
ADGRF1	-0.288126	2.48312	-12.1779	1.25e-26	7.11e-25	49.7811
ID4	-0.256755	2.7528	-12.1667	1.35e-26	7.65e-25	49.699
ABAT	-0.305705	2.67992	-12.1434	1.61e-26	9.04e-25	49.5274
TNC	0.352117	2.98364	12.1354	1.71e-26	9.57e-25	49.4684
CXCL8	0.673181	3.15797	12.1279	1.81e-26	1.01e-24	49.4132
CXCL1	0.530258	3.09055	12.1267	1.82e-26	1.01e-24	49.4041
NREP	0.233397	2.92377	12.0789	2.6e-26	1.42e-24	49.0528
ATP13A4	-0.326548	2.53897	-12.071	2.76e-26	1.5e-24	48.9947
NFIL3	0.247417	3.1402	12.0507	3.21e-26	1.74e-24	48.8449
MTCL1	0.255873	2.98146	12.0419	3.42e-26	1.85e-24	48.7809
OSMR	0.248772	2.96318	12.034	3.63e-26	1.95e-24	48.7228
AADAC	-0.439354	2.59059	-12.0338	3.63e-26	1.95e-24	48.7211
HLF	-0.508247	2.73829	-12.0283	3.78e-26	2.02e-24	48.6809
ASPA	-0.218393	2.34141	-12.0129	4.24e-26	2.25e-24	48.5677
ABLIM3	-0.239342	2.85161	-12.0053	4.49e-26	2.37e-24	48.5116
CHST2	0.252274	2.64479	11.9939	4.88e-26	2.57e-24	48.4282
IFI30	0.224217	3.50019	11.9581	6.37e-26	3.34e-24	48.1655
C5AR1	0.350856	2.86961	11.9184	8.55e-26	4.45e-24	47.8736
BST2	0.369552	3.25023	11.8406	1.52e-25	7.71e-24	47.3036
ARHGAP5-AS1	-0.201779	2.80206	-11.8312	1.63e-25	8.21e-24	47.2349
NNMT	0.309065	3.06151	11.829	1.66e-25	8.32e-24	47.2193
SLC44A3	-0.315399	2.70842	-11.826	1.69e-25	8.48e-24	47.1973
NOX4	0.327666	2.41042	11.7892	2.22e-25	1.1e-23	46.9275
CXCL10	0.578824	3.23729	11.7651	2.65e-25	1.3e-23	46.7518
PTHLH	0.712204	2.92337	11.7646	2.66e-25	1.3e-23	46.7482
VCAN	0.397385	3.23702	11.7543	2.87e-25	1.39e-23	46.673
DCBLD1	0.316532	2.9488	11.7345	3.33e-25	1.6e-23	46.5281
PRSS27	-0.566257	2.96033	-11.7341	3.34e-25	1.6e-23	46.525
ECRG4	-0.361611	2.3767	-11.7198	3.71e-25	1.78e-23	46.4204
PLLP	-0.316651	2.89129	-11.7093	4.01e-25	1.91e-23	46.3439
GDPD3	-0.390466	3.0195	-11.698	4.36e-25	2.07e-23	46.2611
CHN1	0.214763	3.14937	11.6911	4.58e-25	2.17e-23	46.2112
PEG3	-0.551335	2.42536	-11.6798	4.98e-25	2.34e-23	46.1286
TAP1	0.215207	3.33125	11.675	5.16e-25	2.41e-23	46.0937
NR3C2	-0.336065	2.41968	-11.671	5.32e-25	2.46e-23	46.064
SERPINB11	-0.695533	2.64461	-11.6576	5.87e-25	2.7e-23	45.9666
PLEKHA7	-0.266423	2.80924	-11.6516	6.13e-25	2.82e-23	45.9228
SEMA3C	0.403759	2.96142	11.6416	6.6e-25	3.02e-23	45.8498
OCLN	-0.242026	2.78122	-11.6412	6.62e-25	3.02e-23	45.8467
IRS1	0.289083	2.81099	11.6395	6.7e-25	3.05e-23	45.8349
CYP4B1	-0.462205	2.68981	-11.637	6.83e-25	3.1e-23	45.8165
GPT2	-0.343726	2.99696	-11.6073	8.5e-25	3.85e-23	45.5999
NDNF	-0.321991	2.48645	-11.539	1.4e-24	6.23e-23	45.1026
BICDL2	-0.26454	2.98101	-11.5129	1.7e-24	7.45e-23	44.913
SLC16A6	-0.347636	2.92739	-11.4939	1.96e-24	8.44e-23	44.7744
APOL1	0.2713	3.10935	11.4913	1.99e-24	8.57e-23	44.7557
COL12A1	0.314782	2.99823	11.4838	2.11e-24	9.03e-23	44.7017
SMIM3	0.259957	3.06871	11.4801	2.16e-24	9.26e-23	44.6744
EVPL	-0.25772	3.16353	-11.4747	2.25e-24	9.61e-23	44.6355
TGFBI	0.254217	3.55058	11.466	2.4e-24	1.02e-22	44.5719
EPSTI1	0.373879	3.04085	11.4563	2.58e-24	1.09e-22	44.5014
FBLIM1	0.206187	3.04662	11.4471	2.76e-24	1.16e-22	44.4345
EPPK1	0.276963	2.94708	11.4418	2.87e-24	1.21e-22	44.3964
KLF8	-0.236153	2.7373	-11.4206	3.35e-24	1.4e-22	44.2427
LMO7	-0.247593	2.7633	-11.392	4.13e-24	1.72e-22	44.0348
SNX10	0.346317	3.02928	11.3915	4.14e-24	1.72e-22	44.0313
LOC101927972	-0.223139	2.14243	-11.383	4.41e-24	1.82e-22	43.9698
P3H4	0.20261	2.78071	11.3664	4.98e-24	2.05e-22	43.8497
IFI44	0.3543	3.05608	11.3626	5.12e-24	2.1e-22	43.8219
ANGPT2	0.260249	2.70433	11.3622	5.13e-24	2.1e-22	43.8189
MEIS2	-0.228785	3.12972	-11.3427	5.92e-24	2.41e-22	43.6778
C9orf152	-0.318724	2.17853	-11.3399	6.05e-24	2.46e-22	43.6572
ACOX2	-0.205792	2.57632	-11.3287	6.56e-24	2.65e-22	43.5762
IGSF10	-0.287609	2.62529	-11.2932	8.5e-24	3.41e-22	43.3195
ADAMTS12	0.20681	2.72694	11.29	8.7e-24	3.49e-22	43.2966
MACC1	-0.329822	2.698	-11.2839	9.1e-24	3.62e-22	43.2523
CSTB	-0.222024	3.46691	-11.2716	9.96e-24	3.95e-22	43.1634
ASPN	0.433476	3.17842	11.2337	1.31e-23	5.14e-22	42.8892
ECHDC2	-0.210312	3.14238	-11.2239	1.41e-23	5.5e-22	42.819
FPR3	0.269101	2.91847	11.2184	1.47e-23	5.71e-22	42.7792
PITX1	-0.254579	2.91074	-11.1978	1.71e-23	6.6e-22	42.6302
ITGA3	0.289344	2.96098	11.1927	1.77e-23	6.83e-22	42.5938
GPNMB	0.212027	3.31412	11.1644	2.18e-23	8.31e-22	42.3898
TPST1	0.220913	2.98472	11.1569	2.3e-23	8.76e-22	42.3354
FCGR3A	0.428668	2.90302	11.1464	2.48e-23	9.37e-22	42.2599
ACADSB	-0.232801	2.56335	-11.1098	3.24e-23	1.21e-21	41.9961
IFI35	0.235199	3.1483	11.0906	3.72e-23	1.38e-21	41.8581
PTPRZ1	0.336713	3.20621	11.0748	4.18e-23	1.54e-21	41.7446
CDH11	0.288439	2.73142	11.0601	4.65e-23	1.71e-21	41.6382
DDX60	0.299768	3.22092	11.0486	5.05e-23	1.85e-21	41.5556
SULF1	0.387559	3.12335	11.022	6.13e-23	2.22e-21	41.3646
CTTNBP2	-0.282739	2.66603	-11.01	6.69e-23	2.41e-21	41.2783
PTK6	-0.244103	3.12439	-11.0049	6.94e-23	2.49e-21	41.2418
EGFL6	0.332722	3.0598	10.9922	7.61e-23	2.73e-21	41.1509
C1QTNF6	0.212719	2.62495	10.9746	8.64e-23	3.08e-21	41.0247
TRNP1	-0.225173	2.74279	-10.9713	8.85e-23	3.15e-21	41.0012
TLR2	0.241427	3.19943	10.9303	1.19e-22	4.17e-21	40.7069
GPR176	0.202069	2.80408	10.9228	1.26e-22	4.39e-21	40.6536
ADGRD1	-0.274239	2.47418	-10.9174	1.31e-22	4.56e-21	40.6146
HAS3	0.235559	2.85826	10.9073	1.41e-22	4.89e-21	40.5421
SPP1	0.504954	2.71357	10.9035	1.45e-22	5.01e-21	40.5153
NYNRIN	-0.209062	2.91823	-10.8905	1.59e-22	5.47e-21	40.4222
SPARC	0.204137	3.52043	10.8785	1.73e-22	5.92e-21	40.3365
GBP1	0.272804	3.25062	10.8777	1.74e-22	5.94e-21	40.3303
IL1RN	-0.266888	3.1959	-10.8365	2.35e-22	7.86e-21	40.0363
TMEM158	0.329769	2.8231	10.8241	2.57e-22	8.51e-21	39.9476
KLF7	0.215642	2.83443	10.807	2.9e-22	9.55e-21	39.8256
PPP1R14C	0.244982	3.25174	10.7905	3.27e-22	1.07e-20	39.7077
NCF2	0.253834	3.03671	10.7422	4.63e-22	1.49e-20	39.3632
C6orf132	-0.278107	3.01843	-10.7056	6.03e-22	1.93e-20	39.1027
MUC1	-0.281265	2.98979	-10.7048	6.06e-22	1.94e-20	39.0971
RBP7	-0.317687	2.81368	-10.684	7.04e-22	2.24e-20	38.9492
GSDME	0.29327	3.21911	10.6718	7.69e-22	2.44e-20	38.8622
FAM3B	-0.627096	2.95712	-10.6661	8.01e-22	2.53e-20	38.8219
OLFML2B	0.27806	3.09823	10.6549	8.68e-22	2.74e-20	38.7422
ZDHHC11	-0.299117	2.84215	-10.649	9.06e-22	2.85e-20	38.7005
POGLUT2	0.222096	2.84599	10.6273	1.06e-21	3.31e-20	38.5463
AMY1A	-0.475104	2.66242	-10.6156	1.15e-21	3.59e-20	38.463
MPP7	-0.262042	2.75882	-10.607	1.22e-21	3.81e-20	38.4022
S100A7	0.39339	3.71984	10.5996	1.29e-21	4.01e-20	38.3494
TNFRSF12A	0.221069	3.17323	10.5989	1.3e-21	4.02e-20	38.3445
INMT	-0.202349	2.64183	-10.594	1.34e-21	4.16e-20	38.3095
MAL	-0.6412	3.33591	-10.5722	1.57e-21	4.85e-20	38.1556
EXPH5	-0.269663	2.89316	-10.5695	1.6e-21	4.92e-20	38.1362
ABCA8	-0.273004	2.46422	-10.5691	1.61e-21	4.93e-20	38.1333
ZNF431	-0.212801	2.63333	-10.5684	1.62e-21	4.95e-20	38.1281
CRIP1	-0.210136	3.41237	-10.5044	2.55e-21	7.63e-20	37.6753
TCEAL2	-0.322355	2.24009	-10.4933	2.76e-21	8.2e-20	37.5968
CEP55	0.280085	3.02088	10.4792	3.06e-21	9.04e-20	37.497
GCNT3	-0.442991	2.85702	-10.4538	3.67e-21	1.08e-19	37.3176
HENMT1	0.218745	3.01072	10.4413	4.01e-21	1.17e-19	37.2296
HERC5	0.344571	2.96936	10.4381	4.1e-21	1.2e-19	37.2068
RGS1	0.325864	2.95003	10.4339	4.22e-21	1.23e-19	37.1773
CCL3	0.393542	2.99371	10.4327	4.26e-21	1.23e-19	37.1689
GJC1	0.217888	2.57789	10.4193	4.69e-21	1.36e-19	37.0743
SLC2A1	0.275664	3.00049	10.4147	4.84e-21	1.4e-19	37.0422
TM7SF2	-0.305666	2.98417	-10.4144	4.86e-21	1.4e-19	37.0397
THBS2	0.287736	3.3207	10.4028	5.27e-21	1.52e-19	36.9581
CYP2J2	-0.279572	2.75542	-10.4013	5.33e-21	1.53e-19	36.9473
FCER1A	-0.262579	2.60505	-10.3942	5.61e-21	1.61e-19	36.8976
FCGR1B	0.347669	2.78416	10.3868	5.91e-21	1.69e-19	36.8451
PPL	-0.277552	3.52959	-10.3847	6e-21	1.71e-19	36.8303
IL17D	-0.2926	2.41794	-10.3651	6.9e-21	1.95e-19	36.6927
TDO2	0.349359	2.4719	10.3502	7.67e-21	2.17e-19	36.5879
STRBP	-0.213309	2.86093	-10.3233	9.28e-21	2.62e-19	36.3988
FADS1	0.213192	2.9544	10.3228	9.32e-21	2.62e-19	36.3952
SIM2	-0.22719	2.6265	-10.3201	9.5e-21	2.67e-19	36.3758
RAET1E	-0.347972	2.82334	-10.3099	1.02e-20	2.87e-19	36.3047
PROCR	0.244644	3.00396	10.3056	1.05e-20	2.95e-19	36.2744
THBS1	0.293636	2.83251	10.2971	1.12e-20	3.12e-19	36.2145
PRSS2	-0.239014	2.87045	-10.293	1.15e-20	3.21e-19	36.1858
CALB2	-0.283578	2.76432	-10.2916	1.16e-20	3.23e-19	36.1761
HOXD10	0.301074	2.60191	10.2901	1.18e-20	3.26e-19	36.1653
STK39	-0.208198	3.14141	-10.2614	1.44e-20	3.98e-19	35.9643
C1orf116	-0.285842	3.13094	-10.2592	1.46e-20	4.03e-19	35.9484
CYSRT1	-0.418128	3.18446	-10.2486	1.58e-20	4.33e-19	35.8741
ADGRE2	0.22259	2.48636	10.2479	1.59e-20	4.34e-19	35.8696
CAVIN2	-0.285242	2.59197	-10.2267	1.84e-20	5.01e-19	35.7209
HSD17B6	0.270543	2.35538	10.2227	1.9e-20	5.14e-19	35.6928
SLAMF8	0.263812	2.79798	10.2172	1.97e-20	5.33e-19	35.6545
LINC01094	0.27624	2.55274	10.2005	2.22e-20	5.97e-19	35.5376
EPB41L3	-0.274221	2.97825	-10.1988	2.25e-20	6.04e-19	35.5257
NEBL	-0.220548	2.78059	-10.1841	2.49e-20	6.65e-19	35.4229
SCEL	-0.461461	2.95478	-10.183	2.51e-20	6.69e-19	35.4153
HTRA1	0.227428	3.29499	10.1741	2.67e-20	7.09e-19	35.3529
CEMIP2	0.209575	2.89441	10.1672	2.81e-20	7.43e-19	35.3045
CLEC7A	0.219906	2.68043	10.1639	2.87e-20	7.59e-19	35.2813
MEIS1	-0.273821	2.95324	-10.1625	2.9e-20	7.66e-19	35.2719
MMRN1	-0.395472	2.47025	-10.1508	3.15e-20	8.25e-19	35.1897
HOXC9	0.265359	2.48955	10.1439	3.31e-20	8.6e-19	35.1415
TMPRSS11B	-0.843731	3.09965	-10.1283	3.7e-20	9.57e-19	35.0329
RRAGD	-0.29105	3.00056	-10.1242	3.8e-20	9.81e-19	35.0046
GBP6	-0.462759	3.19133	-10.0919	4.78e-20	1.22e-18	34.7789
MARCKSL1	0.235108	3.28639	10.0594	6.01e-20	1.51e-18	34.5527
CTSK	0.204777	3.3745	10.0519	6.33e-20	1.59e-18	34.5003
CLCA4	-0.661388	3.08686	-10.039	6.93e-20	1.73e-18	34.4109
CCL4	0.277479	3.10774	10.0384	6.96e-20	1.74e-18	34.4067
FOXM1	0.201195	2.93651	10.0025	8.97e-20	2.21e-18	34.1568
RSAD2	0.480677	3.00409	9.991	9.72e-20	2.38e-18	34.0773
BMP2	0.320366	2.94175	9.9823	1.03e-19	2.53e-18	34.0168
CCDC9B	-0.207922	2.89652	-9.98079	1.04e-19	2.55e-18	34.0064
SLC6A1	-0.237692	2.2114	-9.97854	1.06e-19	2.59e-18	33.9907
XAF1	0.238065	3.17717	9.96399	1.17e-19	2.85e-18	33.8899
ZNF185	-0.238779	3.40855	-9.95596	1.24e-19	3e-18	33.8341
BGN	0.235668	3.08223	9.93922	1.4e-19	3.37e-18	33.7181
GGTA1P	-0.262393	2.97286	-9.93257	1.46e-19	3.52e-18	33.6721
KIF4A	0.212203	2.97152	9.92658	1.53e-19	3.67e-18	33.6306
GNE	-0.246115	2.96807	-9.90422	1.79e-19	4.26e-18	33.4759
MAB21L3	-0.39043	2.42133	-9.90184	1.82e-19	4.32e-18	33.4594
DLX5	0.289551	2.65968	9.90061	1.83e-19	4.36e-18	33.4509
TENM2	0.450966	3.10653	9.87995	2.12e-19	5e-18	33.308
UGT1A10	-0.411971	2.92752	-9.87882	2.13e-19	5.03e-18	33.3002
IL36G	0.478081	3.12444	9.87343	2.22e-19	5.22e-18	33.2629
BCL2A1	0.477197	2.90193	9.8365	2.87e-19	6.68e-18	33.0079
MALL	-0.21056	3.44194	-9.83398	2.92e-19	6.79e-18	32.9905
CPXM1	0.282211	2.74589	9.83034	2.99e-19	6.96e-18	32.9654
PPP1R1B	-0.245189	2.64526	-9.82958	3.01e-19	6.99e-18	32.9602
SLC38A6	0.23307	2.77824	9.82392	3.13e-19	7.25e-18	32.9211
LRP12	0.302938	2.64176	9.82082	3.2e-19	7.4e-18	32.8998
CXCL9	0.475552	3.20717	9.80588	3.55e-19	8.15e-18	32.7968
DUXAP10	0.422407	2.5489	9.79996	3.7e-19	8.48e-18	32.756
PLP1	-0.348419	2.39102	-9.79254	3.9e-19	8.91e-18	32.7049
SAMSN1	0.306028	2.79668	9.78115	4.22e-19	9.6e-18	32.6265
DUSP5	-0.205386	3.18556	-9.78029	4.24e-19	9.65e-18	32.6206
FCER1G	0.23249	3.12675	9.77658	4.36e-19	9.89e-18	32.595
ITGA5	0.226349	3.12015	9.77228	4.49e-19	1.02e-17	32.5654
UPK1A	-0.377378	2.56635	-9.73611	5.77e-19	1.29e-17	32.3167
CYSLTR1	-0.220761	2.4977	-9.71782	6.56e-19	1.45e-17	32.1911
SCNN1B	-0.314941	2.79813	-9.7025	7.29e-19	1.6e-17	32.086
AEBP1	0.212354	3.34546	9.70022	7.41e-19	1.63e-17	32.0703
CFD	-0.313827	3.12618	-9.68844	8.04e-19	1.76e-17	31.9896
GULP1	-0.244584	2.63502	-9.67967	8.54e-19	1.86e-17	31.9294
ADORA2B	0.221165	3.08034	9.67693	8.71e-19	1.89e-17	31.9107
LTBP1	0.217625	3.19504	9.66578	9.41e-19	2.03e-17	31.8342
CLDN8	-0.399733	2.40148	-9.66318	9.58e-19	2.07e-17	31.8164
GYS2	-0.277	2.09861	-9.65155	1.04e-18	2.23e-17	31.7367
CLDN7	-0.260246	3.22083	-9.64907	1.06e-18	2.27e-17	31.7198
LRRK2	-0.237044	2.63617	-9.64779	1.07e-18	2.28e-17	31.7111
HOXC13	0.202284	2.49434	9.64635	1.08e-18	2.3e-17	31.7012
TSHZ3	0.202335	2.88542	9.62489	1.25e-18	2.65e-17	31.5543
STX19	-0.284554	2.5334	-9.61085	1.38e-18	2.92e-17	31.4584
KRT4	-0.532464	3.05627	-9.60693	1.41e-18	2.99e-17	31.4316
TNFRSF11A	-0.216354	2.51365	-9.59895	1.49e-18	3.15e-17	31.3771
DEPTOR	-0.220366	2.55741	-9.58992	1.59e-18	3.34e-17	31.3154
EYA2	-0.338012	2.81199	-9.56781	1.85e-18	3.87e-17	31.1645
CDC6	0.26014	2.66972	9.5518	2.07e-18	4.29e-17	31.0553
IFIT3	0.297947	3.23642	9.54454	2.18e-18	4.5e-17	31.0058
ARHGAP32	-0.215347	2.8043	-9.5186	2.6e-18	5.33e-17	30.8292
CXCL13	0.687375	3.09805	9.51609	2.65e-18	5.42e-17	30.8122
OASL	0.297096	2.97524	9.5135	2.7e-18	5.51e-17	30.7945
ARTN	0.220156	2.69382	9.50966	2.77e-18	5.65e-17	30.7684
SHOX2	0.204837	2.64533	9.49545	3.05e-18	6.21e-17	30.6718
HOPX	-0.259351	3.03634	-9.48927	3.19e-18	6.46e-17	30.6297
ST6GALNAC1	-0.460035	2.88196	-9.48872	3.2e-18	6.47e-17	30.626
CMPK2	0.369005	3.13593	9.48867	3.2e-18	6.47e-17	30.6256
BNIPL	-0.37077	2.84036	-9.48369	3.31e-18	6.68e-17	30.5918
CLDN10	-0.382695	2.55537	-9.47877	3.42e-18	6.91e-17	30.5584
RAI14	0.220138	3.19272	9.47108	3.61e-18	7.27e-17	30.5062
CYP27B1	0.3172	2.62931	9.44789	4.23e-18	8.46e-17	30.3487
CHSY3	0.248374	2.5734	9.44269	4.39e-18	8.75e-17	30.3135
IL7R	0.304714	3.27122	9.43318	4.68e-18	9.3e-17	30.249
PLEK2	0.216809	3.26819	9.42991	4.79e-18	9.5e-17	30.2268
PTN	-0.32995	2.87236	-9.41403	5.34e-18	1.06e-16	30.1192
IGFBP3	0.202585	3.37769	9.41135	5.44e-18	1.08e-16	30.1011
CRNN	-0.696827	3.28873	-9.41067	5.47e-18	1.08e-16	30.0965
COL4A6	0.27072	2.47194	9.4036	5.74e-18	1.13e-16	30.0486
TGFBR3	-0.302177	3.01106	-9.40069	5.85e-18	1.15e-16	30.0289
BEX4	-0.284727	2.96738	-9.36189	7.64e-18	1.49e-16	29.7665
BLNK	-0.288592	3.23011	-9.33793	9e-18	1.73e-16	29.6047
LAMP3	0.280455	3.19776	9.33478	9.19e-18	1.77e-16	29.5834
MANSC1	-0.292595	3.16597	-9.32567	9.78e-18	1.87e-16	29.5219
TPRG1	-0.257482	2.75028	-9.31465	1.05e-17	2.01e-16	29.4477
SVIP	-0.290844	2.62465	-9.29923	1.17e-17	2.23e-16	29.3437
CYP2E1	-0.352465	2.7404	-9.29183	1.23e-17	2.34e-16	29.2939
MAGED4B	0.236664	2.81038	9.28854	1.26e-17	2.39e-16	29.2717
PCDH17	0.218065	2.71928	9.2852	1.29e-17	2.44e-16	29.2493
VSIG10L	-0.435191	3.09734	-9.27296	1.4e-17	2.63e-16	29.1669
SCG5	0.43628	2.55995	9.26973	1.43e-17	2.69e-16	29.1451
TRIM6	-0.230152	2.82691	-9.24257	1.72e-17	3.2e-16	28.9625
A2ML1	-0.391419	3.07464	-9.23929	1.76e-17	3.26e-16	28.9405
ICAM1	0.209333	2.95753	9.21451	2.09e-17	3.83e-16	28.7742
KIF14	0.234352	2.79517	9.21296	2.11e-17	3.86e-16	28.7637
TYRP1	-0.505719	2.29028	-9.21155	2.13e-17	3.89e-16	28.7543
FOXD1	0.265635	2.77537	9.20615	2.21e-17	4.02e-16	28.7181
OAS2	0.230296	2.9121	9.2042	2.24e-17	4.07e-16	28.705
HSPB8	-0.229002	3.14862	-9.19033	2.46e-17	4.45e-16	28.612
EMILIN1	0.267071	2.68755	9.18596	2.53e-17	4.57e-16	28.5827
RHCG	-0.436613	3.41633	-9.17033	2.82e-17	5.06e-16	28.4781
HPGD	-0.369061	2.92004	-9.16854	2.85e-17	5.11e-16	28.4661
SLC28A3	0.308225	2.80206	9.16517	2.92e-17	5.2e-16	28.4436
CHRDL1	-0.509673	2.78963	-9.1521	3.19e-17	5.66e-16	28.3561
CXCR2	-0.320747	2.82395	-9.14657	3.31e-17	5.87e-16	28.3191
ADH7	-0.515523	2.98498	-9.13466	3.59e-17	6.35e-16	28.2395
CRISP2	-0.336698	2.15152	-9.12299	3.88e-17	6.85e-16	28.1615
SPRR2G	0.502706	3.28216	9.10976	4.25e-17	7.46e-16	28.0732
CLGN	-0.381017	2.2379	-9.09852	4.58e-17	8e-16	27.9982
COL11A1	0.564797	2.59341	9.09546	4.68e-17	8.16e-16	27.9778
S100A7A	0.306009	2.76214	9.08523	5.01e-17	8.7e-16	27.9096
ZIC2	0.373126	2.37696	9.06453	5.76e-17	9.91e-16	27.7717
PRR15L	-0.220515	2.68342	-9.05967	5.96e-17	1.02e-15	27.7393
EHF	-0.242174	3.15222	-9.04952	6.38e-17	1.09e-15	27.6718
PRTFDC1	0.228794	2.93317	9.04367	6.63e-17	1.13e-15	27.6329
SOD2	0.201159	3.09111	9.00576	8.56e-17	1.45e-15	27.381
RGS20	0.26662	2.79421	8.99329	9.31e-17	1.56e-15	27.2983
C1QB	0.234607	3.19111	8.98564	9.8e-17	1.64e-15	27.2475
KRT33A	-0.215563	2.64608	-8.96014	1.16e-16	1.93e-15	27.0785
SUSD4	-0.306333	2.88298	-8.93716	1.36e-16	2.24e-15	26.9265
KHDC1L	0.433321	2.63068	8.93505	1.38e-16	2.27e-15	26.9125
CCN1	0.294741	3.24959	8.92514	1.47e-16	2.42e-15	26.847
PRSS3	-0.315764	3.13219	-8.92242	1.5e-16	2.46e-15	26.829
SPINK5	-0.402644	3.49165	-8.92171	1.51e-16	2.47e-15	26.8244
IL24	0.428282	2.82355	8.91738	1.55e-16	2.54e-15	26.7957
ENPEP	0.29675	2.45037	8.90417	1.69e-16	2.77e-15	26.7085
USP18	0.277077	2.8258	8.89454	1.81e-16	2.94e-15	26.6449
HOXD11	0.216913	2.66915	8.89059	1.85e-16	3.01e-15	26.6189
GPX8	0.254865	2.92295	8.88911	1.87e-16	3.04e-15	26.6091
PCDHB14	0.31907	2.57359	8.87359	2.08e-16	3.36e-15	26.5068
ADAMDEC1	0.480573	2.91333	8.84574	2.5e-16	4.02e-15	26.3233
EIF5A2	0.219516	2.44318	8.84065	2.59e-16	4.16e-15	26.2898
LIPG	0.363658	2.51906	8.82718	2.83e-16	4.52e-15	26.2013
TTC7B	0.24953	2.78168	8.82382	2.9e-16	4.61e-15	26.1792
CEACAM5	-0.269079	3.01597	-8.81462	3.08e-16	4.89e-15	26.1187
HS3ST6	-0.210009	2.47233	-8.81195	3.13e-16	4.97e-15	26.1012
ARSJ	0.29188	2.59066	8.80616	3.26e-16	5.15e-15	26.0632
MMP13	0.602317	2.7907	8.79878	3.42e-16	5.41e-15	26.0147
LDOC1	-0.213513	2.97536	-8.79677	3.47e-16	5.47e-15	26.0015
DHRS9	-0.291631	3.11433	-8.79039	3.62e-16	5.69e-15	25.9596
COL10A1	0.462184	2.73749	8.77507	4.01e-16	6.26e-15	25.8592
AIM2	0.367701	3.09174	8.76836	4.19e-16	6.52e-15	25.8152
SCARA5	-0.244831	2.73779	-8.76781	4.21e-16	6.54e-15	25.8116
ZNF662	-0.209462	2.52484	-8.75971	4.44e-16	6.87e-15	25.7585
TF	-0.2931	2.59617	-8.73746	5.14e-16	7.91e-15	25.6129
KCNT2	-0.214248	2.34488	-8.73415	5.26e-16	8.06e-15	25.5913
C4orf19	-0.272956	2.41752	-8.71101	6.13e-16	9.3e-15	25.44
CCL11	0.326044	2.87469	8.71084	6.14e-16	9.31e-15	25.4389
TGM3	-0.54268	3.34914	-8.71038	6.16e-16	9.33e-15	25.4359
ERVMER34-1	0.227265	2.63709	8.70509	6.38e-16	9.64e-15	25.4013
ABI3BP	-0.264512	2.56093	-8.69193	6.96e-16	1.05e-14	25.3154
HOXB7	0.211256	2.7533	8.6827	7.39e-16	1.11e-14	25.2552
CYP2C18	-0.416869	2.89005	-8.66123	8.52e-16	1.26e-14	25.1154
FJX1	0.216921	2.99292	8.65821	8.69e-16	1.29e-14	25.0957
OSR1	-0.220147	2.46678	-8.6536	8.96e-16	1.32e-14	25.0656
SLC16A7	-0.238727	2.74779	-8.63497	1.01e-15	1.49e-14	24.9444
MEOX2	-0.228331	2.18249	-8.62326	1.09e-15	1.6e-14	24.8683
MSC-AS1	0.227672	2.54628	8.61391	1.16e-15	1.7e-14	24.8076
PTGS2	0.453237	2.78246	8.60041	1.27e-15	1.84e-14	24.72
PYGM	-0.384321	2.6551	-8.59678	1.3e-15	1.89e-14	24.6964
FCGR3B	0.268006	2.95256	8.58328	1.42e-15	2.06e-14	24.6088
ADGRG2	-0.266333	2.31642	-8.55784	1.68e-15	2.42e-14	24.444
IFI44L	0.411713	3.08723	8.55341	1.73e-15	2.48e-14	24.4154
SCGB2A1	-0.40885	2.30793	-8.51532	2.23e-15	3.14e-14	24.1692
TREM1	0.299717	2.85721	8.51175	2.28e-15	3.21e-14	24.1461
LIFR	-0.222286	2.54331	-8.51091	2.29e-15	3.22e-14	24.1407
ALOX12	-0.368066	2.96907	-8.50013	2.46e-15	3.44e-14	24.0711
IRF7	0.200557	3.10748	8.4927	2.58e-15	3.6e-14	24.0232
EP300-AS1	-0.28866	2.49793	-8.48741	2.67e-15	3.72e-14	23.9891
GPX3	-0.237357	3.32473	-8.46347	3.12e-15	4.32e-14	23.8349
LAMP5	0.258	2.71309	8.46264	3.14e-15	4.34e-14	23.8295
ALDH1A1	-0.43671	2.97988	-8.45854	3.23e-15	4.45e-14	23.8032
KIF18A	0.209995	2.59371	8.43951	3.65e-15	4.99e-14	23.6808
GAS1	0.201371	2.96408	8.43277	3.82e-15	5.2e-14	23.6375
CLIC3	-0.33921	3.32688	-8.42586	3.99e-15	5.43e-14	23.5931
IRX4	0.278783	2.70969	8.4199	4.15e-15	5.64e-14	23.5549
LRRN4CL	-0.253755	2.57741	-8.41351	4.33e-15	5.87e-14	23.5139
SH3PXD2A-AS1	-0.279021	2.66347	-8.3756	5.54e-15	7.39e-14	23.2709
ELF3	-0.261807	2.9725	-8.35295	6.42e-15	8.5e-14	23.1261
MUC15	-0.422237	2.88466	-8.34918	6.58e-15	8.7e-14	23.1019
C6orf141	0.25078	2.68447	8.34142	6.91e-15	9.13e-14	23.0524
DCT	-0.233762	2.29828	-8.34056	6.95e-15	9.17e-14	23.0469
MICALCL	0.253264	2.54126	8.33596	7.16e-15	9.41e-14	23.0175
BLACAT1	0.204469	2.49105	8.3197	7.96e-15	1.04e-13	22.9137
CXCL11	0.623129	2.63733	8.2889	9.72e-15	1.25e-13	22.7175
IL18	-0.279703	3.10535	-8.26008	1.17e-14	1.49e-13	22.5342
GLIS3	0.281972	2.5751	8.25341	1.22e-14	1.55e-13	22.4918
CLU	-0.265972	2.952	-8.23425	1.38e-14	1.75e-13	22.3702
CCDC102B	0.218389	2.42284	8.22664	1.45e-14	1.83e-13	22.322
CYP27C1	0.313607	2.56926	8.21194	1.6e-14	2e-13	22.2288
GNLY	0.271175	2.84323	8.20688	1.65e-14	2.06e-13	22.1968
CXCL3	0.391859	2.69923	8.18903	1.85e-14	2.3e-13	22.0838
ARHGEF26	-0.237861	2.4155	-8.17437	2.03e-14	2.52e-13	21.9911
RNASE4	-0.259922	2.91814	-8.16173	2.2e-14	2.72e-13	21.9113
LYPD1	0.207661	2.52194	8.15563	2.29e-14	2.82e-13	21.8728
PEBP4	-0.231916	2.40818	-8.15249	2.34e-14	2.87e-13	21.853
RTP4	0.248389	2.97697	8.14682	2.42e-14	2.97e-13	21.8173
IL6	0.327479	2.91985	8.13067	2.69e-14	3.27e-13	21.7155
CXCL5	0.372889	2.43572	8.1208	2.86e-14	3.46e-13	21.6533
ALDH3A1	-0.389528	3.21051	-8.10629	3.14e-14	3.78e-13	21.562
SLURP1	-0.426933	3.2634	-8.09779	3.32e-14	3.99e-13	21.5086
CA2	0.353176	3.19425	8.0859	3.58e-14	4.29e-13	21.4339
PGAM2	-0.289533	2.53345	-8.0741	3.86e-14	4.59e-13	21.3598
WNT2	0.221124	2.67141	8.07405	3.86e-14	4.59e-13	21.3595
CXCL17	-0.319039	3.1605	-8.06242	4.16e-14	4.92e-13	21.2865
TMPRSS11E	-0.444299	3.233	-8.05245	4.43e-14	5.23e-13	21.224
LRRC8E	0.216695	2.73032	8.03604	4.92e-14	5.77e-13	21.1213
SLC2A3	0.2044	2.89422	8.02992	5.11e-14	5.98e-13	21.0829
IL12RB2	0.316759	2.5208	8.0234	5.33e-14	6.22e-13	21.0421
PLAAT1	-0.30643	2.51534	-8.00173	6.12e-14	7.1e-13	20.9068
MUC4	-0.306049	2.61595	-7.9823	6.92e-14	7.99e-13	20.7855
CFH	-0.21938	3.17888	-7.98187	6.94e-14	8.01e-13	20.7828
VAV3	-0.225868	3.01932	-7.97648	7.18e-14	8.28e-13	20.7492
NOSTRIN	-0.232544	2.56397	-7.95987	7.97e-14	9.15e-13	20.6458
FN1	0.236458	3.24844	7.95344	8.3e-14	9.49e-13	20.6058
ABCA12	0.412064	2.76885	7.92903	9.69e-14	1.1e-12	20.454
MAB21L1	-0.246264	2.30351	-7.9177	1.04e-13	1.18e-12	20.3837
PDE4B	0.219564	2.69065	7.90832	1.1e-13	1.24e-12	20.3255
STRIP2	0.255104	2.42868	7.89133	1.23e-13	1.37e-12	20.2201
ANO1	0.286353	2.99305	7.88795	1.26e-13	1.4e-12	20.1992
CAPNS2	-0.275327	3.28256	-7.88383	1.29e-13	1.43e-12	20.1737
PLS1	-0.305262	2.89978	-7.87553	1.36e-13	1.51e-12	20.1223
ITGB6	0.305608	2.93163	7.87283	1.38e-13	1.53e-12	20.1056
NIPAL1	-0.2137	2.83013	-7.86791	1.42e-13	1.58e-12	20.0751
PI15	0.232443	2.60724	7.84671	1.63e-13	1.79e-12	19.9442
C15orf48	-0.227811	3.39101	-7.84306	1.67e-13	1.83e-12	19.9216
MIR31HG	0.259092	2.80949	7.83998	1.7e-13	1.87e-12	19.9026
RGS4	0.260535	2.69076	7.8396	1.7e-13	1.87e-12	19.9003
CXCR4	0.272969	3.22591	7.81575	1.98e-13	2.16e-12	19.7532
RUNX1-IT1	0.231362	2.86491	7.81437	1.99e-13	2.17e-12	19.7447
PAX1	-0.263192	2.44944	-7.81151	2.03e-13	2.21e-12	19.7271
CXCL6	0.483957	2.68966	7.79798	2.21e-13	2.4e-12	19.6438
AGR2	-0.399009	2.86138	-7.75232	2.94e-13	3.15e-12	19.3633
AGR3	-0.520451	2.313	-7.74197	3.13e-13	3.34e-12	19.2999
SULT2B1	-0.268298	3.10292	-7.7201	3.59e-13	3.81e-12	19.166
IDO1	0.321117	2.99839	7.69764	4.13e-13	4.35e-12	19.0287
IL1B	0.267053	3.1689	7.68726	4.4e-13	4.62e-12	18.9653
TSPAN8	-0.48652	2.50847	-7.65948	5.23e-13	5.46e-12	18.796
SUGCT	0.203405	2.86692	7.65724	5.31e-13	5.53e-12	18.7824
SCGB2A2	-0.411835	2.10677	-7.65509	5.38e-13	5.59e-12	18.7693
GZMB	0.278459	3.02009	7.63398	6.13e-13	6.33e-12	18.6409
BCAT1	0.235464	2.79171	7.57961	8.57e-13	8.66e-12	18.3112
P2RY14	-0.251527	2.93193	-7.57668	8.73e-13	8.81e-12	18.2935
KRT75	0.355786	2.90366	7.55001	1.03e-12	1.03e-11	18.1323
FOSL1	0.245609	2.94451	7.5309	1.16e-12	1.15e-11	18.017
GRHL1	-0.229031	3.23603	-7.52768	1.18e-12	1.17e-11	17.9976
ANGPTL1	-0.30481	2.48492	-7.51799	1.25e-12	1.24e-11	17.9393
IFNE	0.23121	2.29874	7.50051	1.39e-12	1.37e-11	17.834
CCL8	0.267875	2.87144	7.45495	1.84e-12	1.77e-11	17.5606
EVA1A	0.297338	2.56814	7.45181	1.88e-12	1.8e-11	17.5418
CSPG4	0.212203	2.60536	7.44825	1.92e-12	1.84e-11	17.5205
GBP5	0.282499	2.91357	7.44439	1.96e-12	1.88e-11	17.4974
KLK13	-0.262013	2.93521	-7.41669	2.32e-12	2.21e-11	17.3318
FLG	-0.589035	2.73304	-7.38973	2.74e-12	2.58e-11	17.1709
PLPP4	0.287342	2.65669	7.38116	2.88e-12	2.71e-11	17.1199
CCL20	0.415774	3.0506	7.36685	3.14e-12	2.95e-11	17.0347
FLJ32255	0.207941	2.51997	7.36671	3.15e-12	2.95e-11	17.0339
SCGB1D2	-0.228086	2.21723	-7.30283	4.63e-12	4.27e-11	16.655
KLHDC7B	0.246145	2.74228	7.29907	4.74e-12	4.36e-11	16.6327
CHST9	-0.31204	2.27447	-7.29859	4.75e-12	4.37e-11	16.6299
PRR9	0.516756	2.69977	7.2721	5.57e-12	5.08e-11	16.4734
GPAT3	-0.217052	2.93508	-7.25188	6.29e-12	5.7e-11	16.3542
FNDC1	0.351555	2.69216	7.23898	6.8e-12	6.12e-11	16.2783
PPDPFL	-0.26664	2.20047	-7.21815	7.7e-12	6.87e-11	16.1559
ATP1A2	-0.34317	2.5726	-7.21453	7.87e-12	7.01e-11	16.1346
KLK11	-0.261957	3.34533	-7.20071	8.55e-12	7.58e-11	16.0535
NMU	-0.282324	3.19394	-7.20055	8.56e-12	7.59e-11	16.0525
CEACAM7	-0.385287	2.66831	-7.19808	8.68e-12	7.7e-11	16.0381
CYP24A1	0.312345	2.65964	7.19724	8.73e-12	7.72e-11	16.0331
GPR158	0.215068	2.44828	7.18174	9.58e-12	8.43e-11	15.9423
PGBD5	0.202643	2.855	7.17783	9.8e-12	8.62e-11	15.9194
IFIT1	0.262217	3.27101	7.17587	9.92e-12	8.71e-11	15.908
CHI3L1	0.242297	2.84832	7.16596	1.05e-11	9.19e-11	15.85
SLC24A3	-0.20326	3.0468	-7.14203	1.21e-11	1.05e-10	15.7102
CNTNAP2	0.23998	2.51257	7.13732	1.25e-11	1.08e-10	15.6828
CCL2	0.207426	3.14265	7.12236	1.36e-11	1.17e-10	15.5956
PLAC8	-0.373765	3.17072	-7.10313	1.53e-11	1.31e-10	15.4837
TMEM200A	0.293175	2.57786	7.09956	1.56e-11	1.33e-10	15.463
ZNF114	0.218405	2.36261	7.09	1.65e-11	1.4e-10	15.4074
CD207	-0.219113	2.78078	-7.07863	1.77e-11	1.5e-10	15.3415
CDSN	0.381275	2.85964	7.07322	1.82e-11	1.54e-10	15.3101
ATP12A	-0.208153	2.77675	-7.07148	1.84e-11	1.56e-10	15.3
PLCB4	-0.209363	2.45536	-7.05922	1.98e-11	1.67e-10	15.2289
TGM1	-0.24194	3.39248	-7.04387	2.17e-11	1.82e-10	15.1401
CILP	-0.266401	2.85032	-7.03287	2.32e-11	1.93e-10	15.0766
PLN	-0.294048	2.37262	-7.03024	2.35e-11	1.96e-10	15.0614
NTN4	-0.205909	2.77102	-7.0203	2.49e-11	2.06e-10	15.004
CCL18	0.21477	3.3194	7.01231	2.61e-11	2.16e-10	14.9579
TOX3	-0.264581	2.31967	-6.99049	2.97e-11	2.43e-10	14.8322
GRAMD1C	-0.242754	2.84962	-6.99034	2.97e-11	2.43e-10	14.8314
MYO5C	-0.219815	3.00258	-6.98481	3.07e-11	2.51e-10	14.7995
ZG16B	-0.462197	2.88639	-6.97277	3.3e-11	2.68e-10	14.7303
PLAT	0.230778	3.12662	6.96511	3.45e-11	2.79e-10	14.6863
EPHX3	-0.314212	2.96645	-6.95923	3.57e-11	2.88e-10	14.6526
EN1	0.238278	2.26421	6.94644	3.85e-11	3.09e-10	14.5793
GABRP	-0.502173	2.69068	-6.91722	4.56e-11	3.61e-10	14.4121
CEL	-0.237787	2.55215	-6.90611	4.87e-11	3.84e-10	14.3486
STATH	-0.606899	2.49935	-6.90527	4.89e-11	3.86e-10	14.3438
COL17A1	0.232562	3.14339	6.89327	5.25e-11	4.12e-10	14.2753
COMP	0.344902	2.76823	6.85887	6.41e-11	4.97e-10	14.0795
PCDH7	0.208134	2.61768	6.83881	7.2e-11	5.55e-10	13.9656
GRHL3	-0.249305	3.19261	-6.81877	8.08e-11	6.18e-10	13.852
ADTRP	0.207533	2.59028	6.81296	8.36e-11	6.38e-10	13.8191
CYP4F3	-0.255379	2.50473	-6.78815	9.65e-11	7.29e-10	13.6789
SOX11	0.225959	2.34575	6.78781	9.67e-11	7.31e-10	13.677
CEACAM6	-0.261731	3.36455	-6.7601	1.13e-10	8.48e-10	13.5208
MFAP4	-0.216117	2.90014	-6.73363	1.32e-10	9.81e-10	13.372
MUCL1	0.305907	2.79398	6.73199	1.33e-10	9.89e-10	13.3628
NPTX2	0.235544	2.49785	6.70686	1.54e-10	1.13e-09	13.2219
WFDC21P	-0.229973	3.21349	-6.70054	1.6e-10	1.17e-09	13.1865
SPINK7	-0.516234	3.1192	-6.69899	1.61e-10	1.18e-09	13.1779
FGFBP2	-0.315	2.28001	-6.69406	1.66e-10	1.21e-09	13.1503
ENO3	-0.216479	2.46247	-6.6774	1.82e-10	1.32e-09	13.0572
SLC16A14	-0.257324	2.76117	-6.67406	1.86e-10	1.34e-09	13.0386
PLA2G2A	-0.364771	3.0283	-6.63523	2.32e-10	1.65e-09	12.8222
TMEM178A	-0.332399	2.31782	-6.62215	2.49e-10	1.77e-09	12.7496
PCSK1	0.228886	2.27391	6.61182	2.65e-10	1.87e-09	12.6923
FST	0.23195	3.0389	6.60993	2.67e-10	1.89e-09	12.6818
SLC38A5	0.210216	2.91638	6.60861	2.69e-10	1.9e-09	12.6745
CLMP	0.209246	2.86412	6.60111	2.81e-10	1.98e-09	12.6329
MUC5B	-0.357285	2.56328	-6.58707	3.04e-10	2.14e-09	12.5552
DSG2	0.227456	3.14738	6.57221	3.31e-10	2.32e-09	12.473
BTBD11	-0.216991	2.89045	-6.55396	3.67e-10	2.55e-09	12.3723
KLK12	-0.265591	3.17188	-6.53512	4.08e-10	2.82e-09	12.2686
NELL2	0.283819	3.09032	6.53072	4.18e-10	2.89e-09	12.2444
STEAP1B	0.230232	2.72284	6.51834	4.48e-10	3.08e-09	12.1763
IGFL2	0.207793	2.9514	6.50177	4.92e-10	3.36e-09	12.0854
NEFL	0.31738	2.80001	6.49963	4.98e-10	3.4e-09	12.0737
ELAVL2	0.253097	2.38739	6.48025	5.55e-10	3.77e-09	11.9675
RCAN2	-0.208154	2.92572	-6.46032	6.21e-10	4.18e-09	11.8586
TMEM45B	-0.24947	3.05053	-6.45698	6.32e-10	4.26e-09	11.8404
TFF3	-0.280729	2.92098	-6.44031	6.94e-10	4.64e-09	11.7495
SPINK6	0.44041	2.60944	6.41739	7.89e-10	5.25e-09	11.6248
SFRP4	0.359685	2.6518	6.37866	9.78e-10	6.43e-09	11.4148
SCGB3A1	-0.298332	2.8373	-6.36588	1.05e-09	6.86e-09	11.3457
MYOZ1	-0.261715	2.76826	-6.35131	1.14e-09	7.4e-09	11.2671
ATP6V1C2	-0.247982	2.61299	-6.34471	1.18e-09	7.65e-09	11.2314
CASQ1	-0.269495	2.32224	-6.34359	1.19e-09	7.69e-09	11.2254
CNFN	-0.280836	3.53099	-6.32857	1.29e-09	8.33e-09	11.1445
GALNT6	0.233843	2.96229	6.30868	1.44e-09	9.23e-09	11.0376
CRCT1	-0.372156	3.29903	-6.30454	1.47e-09	9.43e-09	11.0154
COX6A2	-0.20312	2.64212	-6.29847	1.52e-09	9.74e-09	10.9828
SSTR5-AS1	-0.242945	2.38319	-6.28982	1.6e-09	1.02e-08	10.9365
HAS2	0.2486	2.63519	6.28076	1.68e-09	1.06e-08	10.888
DACT1	0.260532	2.65416	6.19936	2.62e-09	1.62e-08	10.4543
APOBEC3B	0.241741	3.03344	6.19521	2.68e-09	1.65e-08	10.4323
SLC7A11	0.230651	2.81168	6.17575	2.98e-09	1.82e-08	10.3292
LEMD1	0.232116	2.44135	6.16853	3.09e-09	1.89e-08	10.291
SYNPO2L	-0.221933	2.61665	-6.15204	3.38e-09	2.05e-08	10.204
CYTIP	0.240096	3.00151	6.10633	4.33e-09	2.59e-08	9.96353
TNNI2	-0.312973	2.86247	-6.10454	4.37e-09	2.61e-08	9.95413
CD69	0.290219	2.79023	6.0943	4.62e-09	2.74e-08	9.90043
AMPD1	-0.236801	2.67525	-6.07287	5.18e-09	3.05e-08	9.78835
KRT13	-0.422558	3.60072	-6.06667	5.36e-09	3.15e-08	9.75593
PRR4	-0.374179	2.8332	-6.06655	5.36e-09	3.15e-08	9.75533
ZNF750	-0.217359	3.3319	-6.03441	6.37e-09	3.7e-08	9.58781
SCG2	0.225622	2.40907	6.02668	6.64e-09	3.85e-08	9.54761
SERPINB13	-0.239157	3.03821	-6.02394	6.73e-09	3.9e-08	9.5334
FHL1	-0.229105	3.15022	-6.019	6.91e-09	4e-08	9.50776
CES1	-0.297007	2.89999	-6.00879	7.3e-09	4.2e-08	9.45475
CDKN2A	0.217095	2.8154	5.96937	9e-09	5.12e-08	9.25081
DPT	-0.2177	3.03026	-5.92718	1.13e-08	6.32e-08	9.03366
UPK1B	-0.348515	2.68729	-5.9167	1.19e-08	6.65e-08	8.97989
KRT23	-0.278294	3.13292	-5.90295	1.28e-08	7.11e-08	8.90944
OLR1	0.245699	2.31266	5.88127	1.43e-08	7.9e-08	8.79863
WDR72	0.213877	2.56071	5.85103	1.68e-08	9.16e-08	8.64451
BPIFB2	-0.309324	2.71768	-5.84922	1.69e-08	9.25e-08	8.63533
OGN	-0.313209	2.54818	-5.82984	1.88e-08	1.02e-07	8.5369
CSAG3	0.238795	2.58954	5.82656	1.91e-08	1.03e-07	8.52027
SERPINB2	-0.217639	3.41475	-5.7828	2.39e-08	1.28e-07	8.29901
PKIA	-0.225091	2.67051	-5.74992	2.84e-08	1.51e-07	8.13359
APOD	-0.246864	3.10968	-5.74622	2.89e-08	1.53e-07	8.11506
WIF1	-0.297223	2.3287	-5.74205	2.96e-08	1.56e-07	8.09414
PIP	-0.335561	2.65572	-5.70041	3.66e-08	1.92e-07	7.88586
LCN2	-0.214837	3.46734	-5.68804	3.9e-08	2.04e-07	7.82419
SULT1E1	0.223601	2.22443	5.688	3.91e-08	2.04e-07	7.82402
DAPL1	-0.313935	3.13549	-5.68201	4.03e-08	2.1e-07	7.7942
ASPRV1	0.271231	2.98412	5.68135	4.04e-08	2.11e-07	7.7909
FOXA1	-0.232751	2.38511	-5.67628	4.15e-08	2.16e-07	7.7657
ZBED2	-0.206058	3.01711	-5.65719	4.57e-08	2.37e-07	7.67091
CYP4X1	-0.312418	2.76855	-5.65052	4.73e-08	2.44e-07	7.63781
APOBEC3A	0.27499	3.15851	5.63669	5.08e-08	2.61e-07	7.56937
CYP4F22	-0.20328	2.70393	-5.61889	5.56e-08	2.84e-07	7.48144
PNLIPRP3	0.366249	2.658	5.61715	5.61e-08	2.86e-07	7.47288
SOST	0.239854	2.23398	5.61462	5.68e-08	2.9e-07	7.46036
UBD	0.2704	3.14723	5.61235	5.75e-08	2.93e-07	7.4492
BPIFB1	-0.399263	2.69644	-5.60541	5.95e-08	3.02e-07	7.41501
DUOX2	-0.239344	2.9184	-5.59218	6.36e-08	3.22e-07	7.34986
MAGEA3	0.346047	2.43255	5.5901	6.43e-08	3.25e-07	7.33965
ADIPOQ	-0.237069	2.17612	-5.57242	7.03e-08	3.53e-07	7.25289
CKMT2	-0.248658	2.46214	-5.56392	7.34e-08	3.68e-07	7.21121
CP	-0.242985	2.66348	-5.54906	7.91e-08	3.95e-07	7.1385
SLCO1B3	0.286609	2.46458	5.53525	8.48e-08	4.21e-07	7.07107
MAGEA6	0.478858	2.53566	5.50088	1.01e-07	4.94e-07	6.90383
FMO2	-0.245227	3.0351	-5.49979	1.01e-07	4.96e-07	6.89851
CA3	-0.354706	2.28141	-5.46976	1.18e-07	5.7e-07	6.75304
WFDC12	0.223984	3.01664	5.46283	1.22e-07	5.88e-07	6.71956
NMRAL2P	0.258728	2.79886	5.43727	1.38e-07	6.62e-07	6.59638
KRT19	-0.270121	2.88288	-5.42878	1.44e-07	6.89e-07	6.55553
GPR171	0.238169	2.64032	5.40832	1.6e-07	7.57e-07	6.45737
TNNC2	-0.344607	2.82225	-5.40058	1.66e-07	7.85e-07	6.42026
FLRT3	0.310091	2.94557	5.36214	2.01e-07	9.36e-07	6.23677
VEGFC	0.208905	2.79848	5.35389	2.09e-07	9.73e-07	6.19755
MYH6	-0.265357	2.54761	-5.33922	2.25e-07	1.04e-06	6.12788
IL33	-0.253331	2.64823	-5.3106	2.58e-07	1.19e-06	5.99235
POPDC3	0.253871	2.76668	5.29084	2.85e-07	1.3e-06	5.89913
MYH7	-0.204143	2.58269	-5.26675	3.2e-07	1.45e-06	5.78583
H19	-0.290488	3.04244	-5.1912	4.61e-07	2.04e-06	5.43321
CST1	0.302854	2.42188	5.15878	5.38e-07	2.36e-06	5.28307
DSC1	0.394355	2.76226	5.13471	6.04e-07	2.62e-06	5.17213
KLRC1	0.213406	2.57738	5.13056	6.16e-07	2.67e-06	5.15302
CKM	-0.368651	2.88965	-5.12324	6.38e-07	2.76e-06	5.11937
MYH2	-0.514865	2.68662	-5.09318	7.36e-07	3.15e-06	4.98164
SRPX	-0.210294	3.08379	-5.08907	7.5e-07	3.21e-06	4.96284
CCNA1	0.279484	2.45432	5.07586	7.98e-07	3.4e-06	4.90259
ITLN1	-0.204847	2.33798	-5.06944	8.23e-07	3.49e-06	4.87332
MB	-0.320734	2.99152	-4.96177	1.36e-06	5.6e-06	4.38707
PCOLCE2	-0.205562	2.44901	-4.93646	1.53e-06	6.24e-06	4.27401
SLC6A14	0.267572	2.87495	4.85766	2.2e-06	8.72e-06	3.9249
MMP7	0.221247	3.07537	4.83886	2.4e-06	9.45e-06	3.84231
PTX3	0.255594	2.36937	4.79749	2.9e-06	1.12e-05	3.66143
MAGEA4	0.309264	2.36691	4.78621	3.05e-06	1.18e-05	3.61232
DMBT1	-0.220065	2.83328	-4.78472	3.07e-06	1.19e-05	3.60587
MYBPC1	-0.379388	2.66256	-4.78178	3.11e-06	1.2e-05	3.59308
ALOX12B	0.254128	2.87103	4.7716	3.26e-06	1.25e-05	3.54891
TFF1	-0.226589	2.57473	-4.70445	4.4e-06	1.66e-05	3.25934
SERPINA3	0.201715	3.04885	4.68931	4.71e-06	1.77e-05	3.1945
CARD18	0.235146	2.56222	4.67933	4.93e-06	1.84e-05	3.15187
ELOVL4	-0.225199	2.78028	-4.66923	5.15e-06	1.92e-05	3.10878
CWH43	-0.247305	2.76881	-4.64068	5.85e-06	2.16e-05	2.98744
TFPI2	0.205681	2.26961	4.62083	6.38e-06	2.34e-05	2.90344
MYOT	-0.280023	2.34452	-4.59029	7.3e-06	2.65e-05	2.77479
SHISA2	0.225283	2.6948	4.58088	7.61e-06	2.76e-05	2.73531
DKK1	0.257877	2.71143	4.56223	8.25e-06	2.98e-05	2.65719
ACTA1	-0.381684	3.00223	-4.54531	8.89e-06	3.19e-05	2.5866
SOSTDC1	-0.20348	2.80822	-4.53007	9.5e-06	3.39e-05	2.5232
KRT24	-0.310699	2.85779	-4.47699	1.19e-05	4.2e-05	2.30372
PIGR	-0.251008	2.74842	-4.47338	1.21e-05	4.27e-05	2.28889
MAGEA12	0.24597	2.38944	4.46272	1.27e-05	4.45e-05	2.24507
KLHL41	-0.358766	2.66682	-4.45664	1.3e-05	4.55e-05	2.22016
C4orf54	-0.207838	2.28589	-4.42828	1.47e-05	5.1e-05	2.10421
TCHH	0.210529	2.30175	4.23961	3.25e-05	0.000107	1.34896
RNF128	-0.224942	2.85787	-4.18119	4.13e-05	0.000133	1.12077
KRT1	0.293269	3.21378	4.15723	4.55e-05	0.000146	1.02799
LCE3D	0.225316	3.37216	4.1503	4.68e-05	0.00015	1.00122
LCE2B	0.235829	2.52558	4.11868	5.33e-05	0.000169	0.879613
MYLPF	-0.209237	2.99409	-4.01913	7.93e-05	0.000244	0.50205
TRDN	-0.228087	2.24693	-4.0148	8.07e-05	0.000247	0.485835
LMOD2	-0.227845	2.55583	-3.97052	9.61e-05	0.000291	0.320632
TNNC1	-0.31266	2.77078	-3.93734	0.000109	0.000327	0.197862
MYL1	-0.301954	2.93957	-3.93456	0.000111	0.00033	0.187629
CALB1	0.22612	2.289	3.83187	0.000164	0.000477	-0.18633
MUC7	-0.213697	2.32415	-3.7604	0.000215	0.000612	-0.441479
PITX2	-0.220053	2.63801	-3.6792	0.000292	0.000808	-0.72619
LTF	-0.249091	3.06484	-3.4944	0.00057	0.001493	-1.35347
PROM1	-0.249545	2.40688	-3.39758	0.000802	0.002034	-1.67056
SERPINB4	0.237298	3.21701	3.38899	0.000826	0.00209	-1.69831
SLN	-0.231534	2.9068	-3.32839	0.001018	0.002527	-1.89219
XIRP2	-0.249585	2.55493	-3.09236	0.002232	0.005164	-2.61701
CSRP3	-0.230553	2.67938	-3.06915	0.002406	0.005525	-2.68565
SMPX	-0.207079	2.70949	-2.84656	0.004821	0.010383	-3.31959
MYL2	-0.234085	2.75474	-2.71529	0.007127	0.014796	-3.67261
FLG2	0.206957	2.30554	2.67828	0.007937	0.016308	-3.7693
AZGP1	-0.218542	2.67092	-2.54105	0.011714	0.023181	-4.11699
